# Supplementary material for: Evaluation of Usnea barbata (L.) Weber ex F.H. Wigg Extract in Canola Oil Loaded in Bioadhesive Oral Films for Potential Applications in Oral Cavity Infections and Malignancy
Source: MDPI journal article supplement (doi:10.3390/antiox11081601), 2022-08-19
Supplement: s1 [file s1]

**Table S1.** The inhibitory activity of F-UBO on Gram-positive (*S. aureus*) and Gram-negative bacteria (*P. aeruginosa*) after 24 ore incubation at 37 °C.

| CTR (mg/mL)    |                 | <i>S. aureus</i>                                                                   |                                                                                    | <i>P. aeruginosa</i>                                                                |                                                                                      | F-UBO          |
|----------------|-----------------|------------------------------------------------------------------------------------|------------------------------------------------------------------------------------|-------------------------------------------------------------------------------------|--------------------------------------------------------------------------------------|----------------|
| 30.230 ± 0.630 | 122.330 ± 0.850 | CTR                                                                                | F-UBO                                                                              | CTR                                                                                 | F-UBO                                                                                | 63.533 ± 1.955 |
| 1.511 ± 0.043  | 6.117 ± 0.042   |   |   |   |   | 3.176 ± 0.097  |
| 0.755 ± 0.022  | 4.893 ± 0.034   |   |   |   |   | 1.588 ± 0.048  |
| 0.377 ± 0.011  | 3.914 ± 0.027   |   |   |   |   | 0.794 ± 0.024  |
| 0.188 ± 0.005  | 3.131 ± 0.021   |   |   |   |   | 0.397 ± 0.012  |
| 0.094 ± 0.002  | 2.505 ± 0.017   |   |   |   |   | 0.199 ± 0.008  |
| 0.047 ± 0.002  | 2.004 ± 0.014   |   |   |   |   | 0.100 ± 0.004  |
| 0.023 ± 0.001  | 1.603 ± 0.011   |  |  |  |  | 0.049 ± 0.002  |

CTR—Ceftriaxone, F-UBO—Bioadhesive oral film with *U. barbata* extract in canola oil;  
 \* results interpreted by using Resazurin dye chart, adapted from Madushan et al. [46]  
 as follows: blue—"excellent"; light blue—"very good"; violet—"good"; purple-pink—"moderate"; light pink—"low"; pink—"very low"; white—"no effect."

**Table S2.** The antibacterial and antifungal activities of 5% P407.

| <i>S. aureus</i>                                                                    |                                                                                     | <i>P. aeruginosa</i>                                                                |                                                                                     | <i>C. albicans</i>                                                                   |                                                                                       | <i>C. parapsilosis</i>                                                                |                                                                                       | P407 (mg/mL)   |
|-------------------------------------------------------------------------------------|-------------------------------------------------------------------------------------|-------------------------------------------------------------------------------------|-------------------------------------------------------------------------------------|--------------------------------------------------------------------------------------|---------------------------------------------------------------------------------------|---------------------------------------------------------------------------------------|---------------------------------------------------------------------------------------|----------------|
| CTR                                                                                 | P407                                                                                | CTR                                                                                 | P407                                                                                | TRF                                                                                  | P407                                                                                  | TRF                                                                                   | P407                                                                                  | 50.133 ± 1.305 |
| 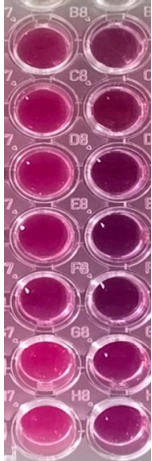 |  |  |  |   |  |  |  | 2.506 ± 0.065  |
|  |  |  |  |   |  |  |  | 1.253 ± 0.032  |
|  |  |  |  |   |  |  |  | 0.626 ± 0.016  |
|  |  |  |  |   |  |  |  | 0.315 ± 0.008  |
|  |  |  |  |   |  |  |  | 0.157 ± 0.004  |
|  |  |  |  |   |  |  |  | 0.078 ± 0.002  |
|  |  |  |  |   |  |  |  | 0.039 ± 0.001  |
|  |                                                                                     |  |                                                                                     |  |                                                                                       |  |                                                                                       | **             |
| (a)                                                                                 | (b)                                                                                 | (c)                                                                                 | (d)                                                                                 | (e)                                                                                  | (f)                                                                                   | (g)                                                                                   | (h)                                                                                   |                |

CTR—Ceftriaxone, P407—Poloxamer 407, TRF—Terbinafine

\* Results interpreted by using Resazurin dye chart, adapted from Madushan et al. [46]  
 as follows: blue—"excellent"; light blue—"very good"; violet—"good"; purple-pink—"moderate"; light pink—"low"; pink—"very low"; white—"no effect" (a-d)

\*\* Results interpreting adapted from Bitacura et al. [48] (e-h)

**Table S3.** The inhibitory activity of F-UBO on *C. albicans* and *C. parapsylosis* after 24 ore incubation at 35 °C; the color score and signification [48].

| Dil. | TRF (mg/mL)<br>10.050 ± 0.180 | <i>C. albicans</i>                                                                |                                                                                   | <i>C. parapsylosis</i>                                                            |                                                                                   | Color<br>**                                                                         | Score<br>** | Signification**                            |
|------|-------------------------------|-----------------------------------------------------------------------------------|-----------------------------------------------------------------------------------|-----------------------------------------------------------------------------------|-----------------------------------------------------------------------------------|-------------------------------------------------------------------------------------|-------------|--------------------------------------------|
|      |                               | TRF                                                                               | F-UBO                                                                             | TRF                                                                               | F-UBO                                                                             |                                                                                     |             |                                            |
| 1    | 0.500 ± 0.009                 |  |  |  |  |  | 0           | Blue – cells are death                     |
| 2    | 0.250 ± 0.004                 |  |  |  |  |  | 1           | Violet-blue – cells are partially death    |
| 3    | 0.125 ± 0.002                 |  |  |  |  |  | 2           | Violet – cells are alive; no proliferation |
| 4    | 0.061 ± 0.001                 |  |  |  |  |  | 3           | Light-violet – low proliferation           |
| 5    | 0.031 ± 0.001                 |  |  |  |  |  | 4           | Dark pink – moderate proliferation         |
| 6    | 0.015 ± 0.001                 |  |  |  |  |  | 5           | Pink – fast proliferation                  |
| 7    | 0.007 ± 0.001                 |  |  |  |  |  | 6           | Light pink – very fast proliferation       |

TRF – Terbinafine, F-UBO – bioadhesive films with *U. barbata* extract in canola oil.

\*\* Results interpreting adapted from Bitacura et al. [48].
